# Supplementary material for: Computational discovery of PtS2/GaSe van der Waals heterostructure for solar energy applications
Source: Royal Society of Chemistry journal article supplement (doi:10.1039/d1cp02436a), 2021-01-01
Supplement: d1cp02436a1.pdf [file d1cp02436a1.pdf]

Supporting information for

**Computational discovery of PtS<sub>2</sub>/GaSe van der Waals heterostructure for solar energy  
applications**

Rui Xiong<sup>1</sup>, Rong Hu<sup>1</sup>, Yinggan Zhang<sup>2</sup>, Xuhui Yang<sup>1</sup>, Peng Lin<sup>1</sup>, Cuilian Wen<sup>1</sup>, Baisheng Sa<sup>1,\*</sup> and

Zhimei Sun<sup>3,\*\*</sup>

<sup>1</sup>*Key Laboratory of Eco-materials Advanced Technology, College of Materials Science and  
Engineering, Fuzhou University, Fuzhou 350108, P. R. China*

<sup>2</sup>*College of Materials, Fujian Provincial Key Laboratory of Theoretical and Computational  
Chemistry, Xiamen University, Xiamen 361005, P. R. China*

<sup>3</sup>*School of Materials Science and Engineering, and Center for Integrated Computational Materials  
Science, International Research Institute for Multidisciplinary Science, Beihang University, Beijing  
100191, P. R. China*

\*Corresponding Author: [bssa@fzu.edu.cn](mailto:bssa@fzu.edu.cn) (B. Sa).

\*\*Corresponding Author: [zmsun@buaa.edu.cn](mailto:zmsun@buaa.edu.cn) (Z. Sun).

Table S1. The parameters for the solar cell simulation

| Materials properties                                              | PtS <sub>2</sub> /GaSe | CIGS                  | ZnO                   |
|-------------------------------------------------------------------|------------------------|-----------------------|-----------------------|
| Thickness [ $\mu\text{m}$ ]                                       | 0.002                  | 2                     | 0.05                  |
| Bandgap [eV]                                                      | 1.81                   | 1.1                   | 3.37                  |
| Electron affinity [eV]                                            | 4.4                    | 4.5                   | 4.6                   |
| Dielectric permittivity                                           | 5.2                    | 13.6                  | 9                     |
| Density of states in CB [ $\text{cm}^{-3}$ ]                      | $6.39 \times 10^{18}$  | $2.2 \times 10^{18}$  | $2.2 \times 10^{18}$  |
| Density of states in VB [ $\text{cm}^{-3}$ ]                      | $2.52 \times 10^{19}$  | $1.8 \times 10^{19}$  | $1.8 \times 10^{19}$  |
| Thermal velocity of electron [ $\text{cm/s}$ ]                    | $1.86 \times 10^7$     | $1 \times 10^7$       | $1 \times 10^7$       |
| Thermal velocity of hole [ $\text{cm/s}$ ]                        | $1.17 \times 10^7$     | $1 \times 10^7$       | $1 \times 10^7$       |
| Electron mobility [ $\text{cm}^2/(\text{V s})$ ]                  | 3168                   | 100                   | 150                   |
| Hole mobility [ $\text{cm}^2/(\text{V s})$ ]                      | 2188                   | 25                    | 25                    |
| Donor concentration [ $\text{cm}^{-3}$ ]                          | $1 \times 10^{19}$     | 0                     | $1 \times 10^{17}$    |
| Acceptor concentration [ $\text{cm}^{-3}$ ]                       | 0                      | $2 \times 10^{16}$    | 0                     |
| Absorption coefficient [ $\text{cm}^{-1}$ ]                       | file                   | SCAPS                 | SCAPS                 |
| Radiative recombination coefficient [ $\text{cm}^{-3}/\text{s}$ ] | $1.0 \times 10^{-10}$  | $1.0 \times 10^{-10}$ | $1.0 \times 10^{-10}$ |

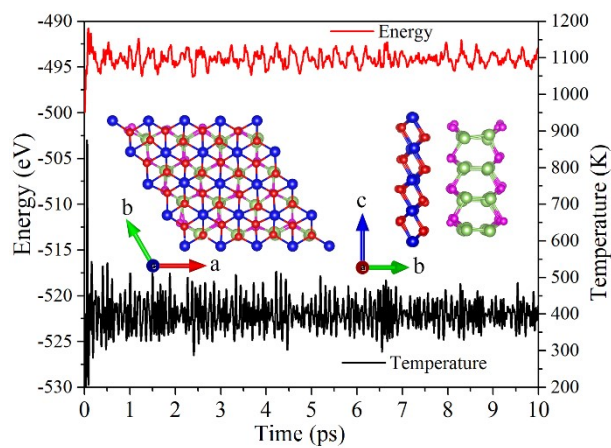

Figure S1. Evolution of total energy and temperature as well as snapshot structure from AIMD simulations of PtS<sub>2</sub>/GaSe heterostructure.

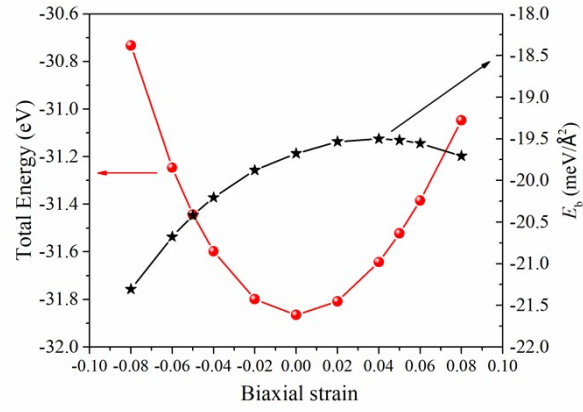

Figure S2. The total energy and binding energy ( $E_b$ ) of PtS<sub>2</sub>/GaSe heterostructures as function of biaxial strain.

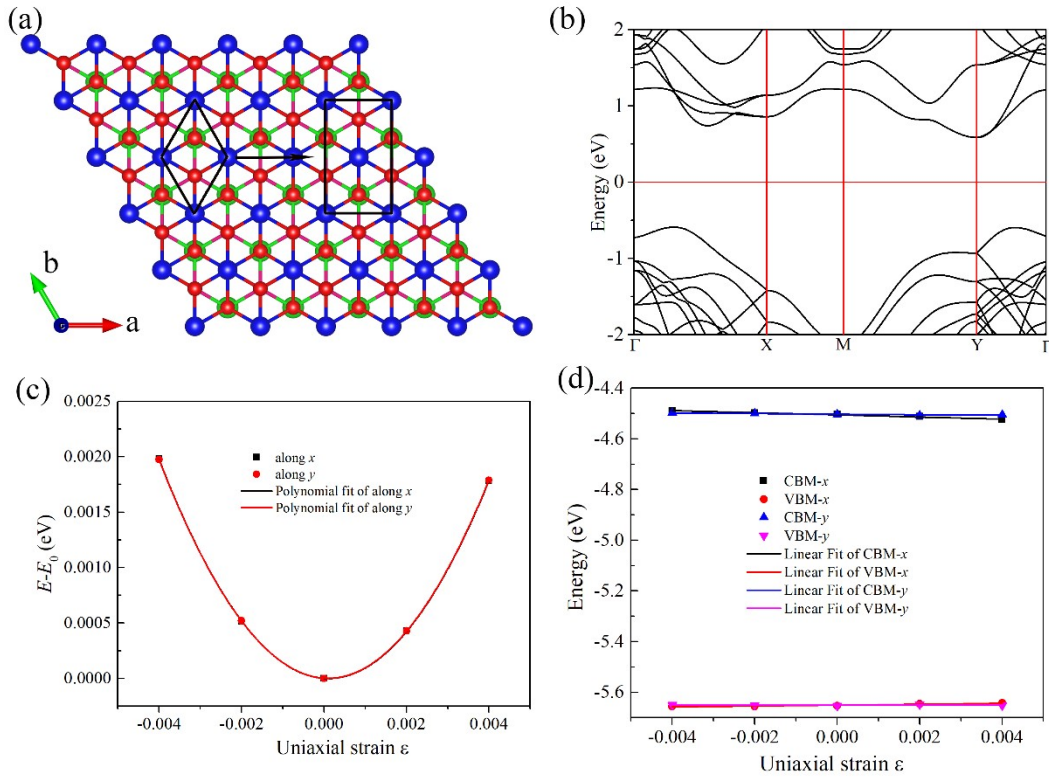

Figure S3. (a) The orthorhombic lattice structure and (b) band structure of PtS<sub>2</sub>/GaSe heterostructure. (c) Total energy shift ( $E - E_0$ ) and (d) band edge positions of PtS<sub>2</sub>/GaSe as a function of the uniaxial strain  $\epsilon$  along both the zigzag (x) and armchair (y) directions by using PBE functional.

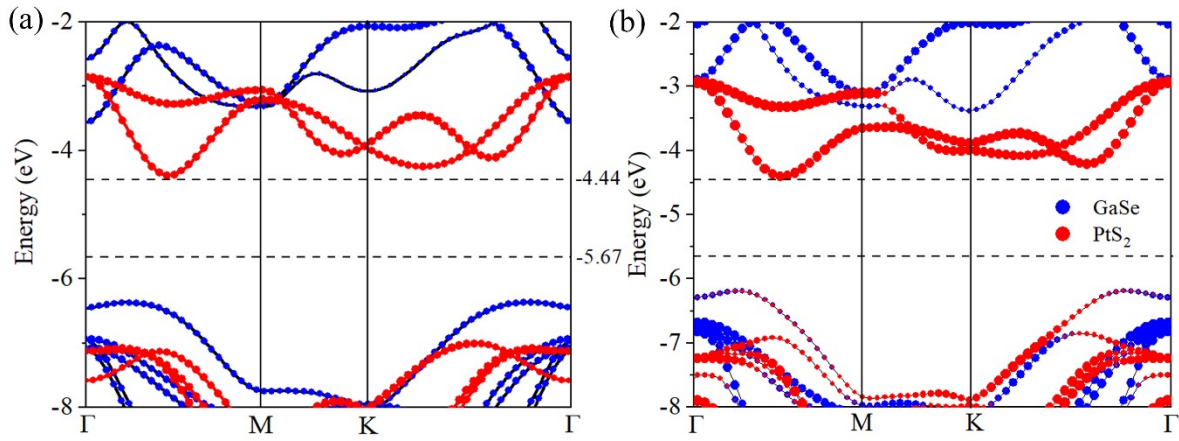

Figure S4. (a) The band structures of PtS<sub>2</sub> (red line) and GaSe (blue line) monolayers constrained in the PtS<sub>2</sub>/GaSe heterostructure lattice constants based on the HSE06 functional. (b) Layered projected band structure of PtS<sub>2</sub>/GaSe heterostructure, in which red and blue balls represent the contribution of up-layer (PtS<sub>2</sub>) and down-layer (GaSe)

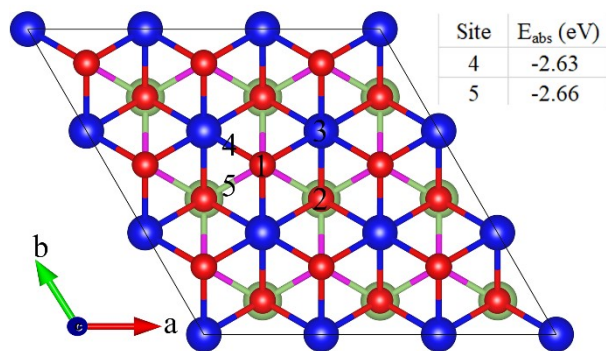

Figure S5. The possible absorption sites of H atom on the PtS<sub>2</sub> surface.

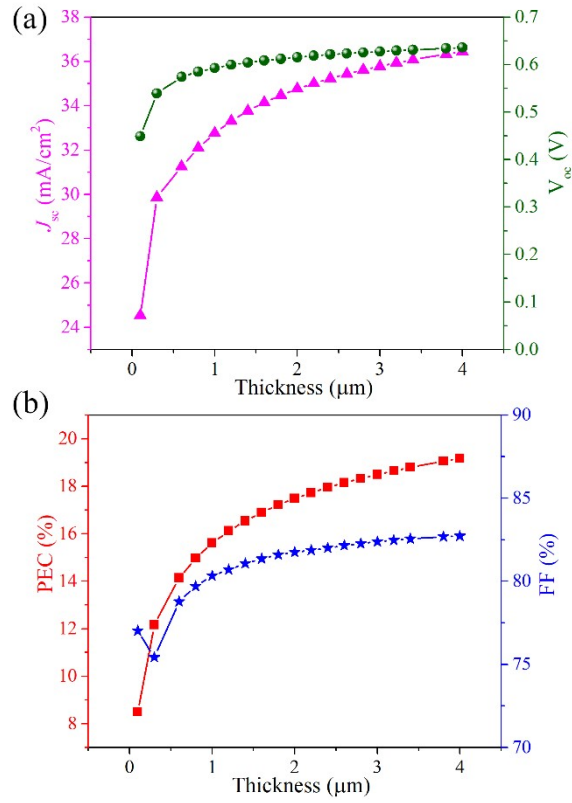

Figure S6 (a) The short-circuit current ( $J_{sc}$ ) and open-circuit voltage ( $V_{oc}$ ), (b) power efficiency conversion (PEC) and fill factor (FF) as function of CIGS thickness.



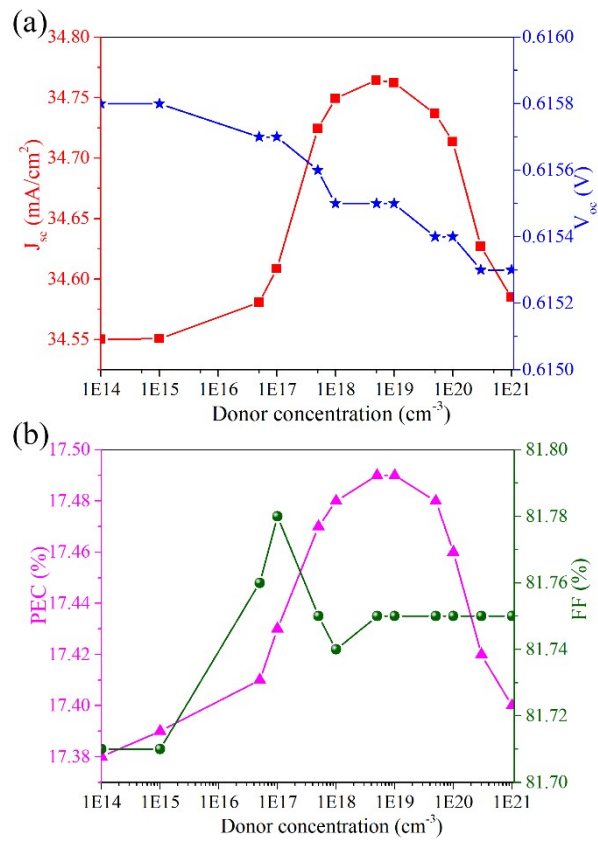

Figure S7 (a) The short-circuit current ( $J_{sc}$ ) and open-circuit voltage ( $V_{oc}$ ), (b) power efficiency conversion (PEC) and fill factor (FF) as function of PtS<sub>2</sub>/GaSe carrier concentration.
